# Supplementary material for: Pleomorphic bacteria-like structures in human blood represent non-living membrane vesicles and protein particles
Source: PubMed Central journal article supplement (PMC5587737; doi:10.1038/s41598-017-10479-8), 2017-09-06

## Supplementary Information

### **Pleomorphic bacteria-like structures in human blood represent non-living membrane vesicles and protein particles**

Jan Martel<sup>1,2,3</sup>, Cheng-Yeu Wu<sup>1,2,3,4</sup>, Pei-Rong Huang<sup>1,2,5</sup>, Wei-Yun Cheng<sup>1,2,3</sup> and John D. Young<sup>1,2,3,6,7</sup>

<sup>1</sup>Center for Molecular and Clinical Immunology, Chang Gung University, Taoyuan, Taiwan.

<sup>2</sup>Laboratory of Nanomaterials, Chang Gung University, Taoyuan, Taiwan.

<sup>3</sup>Chang Gung Immunology Consortium, Linkou Chang Gung Memorial Hospital, Taoyuan, Taiwan.

<sup>4</sup>Research Center of Bacterial Pathogenesis, Chang Gung University, Taoyuan, Taiwan.

<sup>5</sup>Department of Molecular and Cellular Biology, College of Medicine, Chang Gung University, Taoyuan, Taiwan.

<sup>6</sup>Laboratory of Cellular Physiology and Immunology, Rockefeller University, New York, NY.

<sup>7</sup>Biochemical Engineering Research Center, Ming Chi University of Technology, Taipei, Taiwan.

## Supplementary Information

**Supplementary Table 1. Proteins identified in membrane vesicles derived from blood**

| No. | Protein Identified                           | UniProt Accession No. | MW (kDa) | Membrane Vesicles |       |
|-----|----------------------------------------------|-----------------------|----------|-------------------|-------|
|     |                                              |                       |          | Spectra           | emPAI |
| 1   | Complement C3                                | P01024                | 187.0    | 544.5             | 15.2  |
| 2   | Complement C4-B                              | P0C0L5                | 192.6    | 135.4             | 6.3   |
| 3   | Complement C4-A                              | P0C0L4                | 192.7    | 129.6             | 6.1   |
| 4   | Alpha-2-macroglobulin                        | P01023                | 163.2    | 89.3              | 4.6   |
| 5   | Complement C5                                | P01031                | 188.2    | 50.0              | 2.1   |
| 6   | Complement factor H                          | P08603                | 139.0    | 44.6              | 2.6   |
| 7   | Ceruloplasmin                                | P00450                | 122.1    | 42.2              | 2.6   |
| 8   | C4b-binding protein alpha chain              | P04003                | 67.0     | 35.9              | 2.8   |
| 9   | Complement C1r subcomponent                  | P00736                | 80.1     | 33.5              | 3.1   |
| 10  | Inter-alpha-trypsin inhibitor heavy chain H4 | Q14624                | 103.3    | 33.5              | 2.3   |
| 11  | Complement factor B                          | P00751                | 85.5     | 33.0              | 2.9   |
| 12  | Complement C1s subcomponent                  | P09871                | 76.6     | 31.5              | 2.5   |
| 13  | Plasminogen                                  | P00747                | 90.5     | 28.6              | 2.7   |
| 14  | Vitamin D-binding protein                    | P02774                | 52.9     | 28.1              | 5.9   |
| 15  | Serotransferrin                              | P02787                | 77.0     | 28.1              | 4.0   |
| 16  | Inter-alpha-trypsin inhibitor heavy chain H1 | P19827                | 101.3    | 24.3              | 1.5   |
| 17  | Hemopexin                                    | P02790                | 51.6     | 23.8              | 2.9   |
| 18  | Human serum albumin                          | P02768                | 69.3     | 23.3              | 3.7   |

|    |                                              |        |       |      |     |
|----|----------------------------------------------|--------|-------|------|-----|
| 19 | Histidine-rich glycoprotein                  | P04196 | 59.5  | 16.0 | 1.0 |
| 20 | Complement factor I                          | P05156 | 65.7  | 15.5 | 1.5 |
| 21 | Attractin                                    | O75882 | 158.4 | 14.6 | 0.6 |
| 22 | Beta-2-glycoprotein 1                        | P02749 | 38.3  | 14.6 | 2.2 |
| 23 | Complement C2                                | P06681 | 83.2  | 14.6 | 1.7 |
| 24 | Vitamin K-dependent protein S                | P07225 | 75.1  | 14.6 | 1.2 |
| 25 | Ig mu chain C region                         | P01871 | 49.3  | 14.1 | 2.0 |
| 26 | Gelsolin                                     | P06396 | 85.6  | 14.1 | 1.1 |
| 27 | Inter-alpha-trypsin inhibitor heavy chain H2 | P19823 | 106.4 | 14.1 | 0.5 |
| 28 | Complement component C6                      | P13671 | 104.7 | 13.6 | 1.1 |
| 29 | Afamin                                       | P43652 | 69.0  | 13.1 | 1.4 |
| 30 | Kininogen-1                                  | P01042 | 71.9  | 12.6 | 1.5 |
| 31 | Ig gamma-1 chain C region                    | P01857 | 36.1  | 12.1 | 1.8 |
| 32 | Protein AMBP                                 | P02760 | 39.0  | 12.1 | 2.2 |
| 33 | Pigment epithelium-derived factor            | P36955 | 46.3  | 12.1 | 1.7 |
| 34 | Ig gamma-3 chain C region                    | P01860 | 41.3  | 11.2 | 1.2 |
| 35 | Complement component C8 alpha chain          | P07357 | 65.1  | 10.7 | 1.3 |
| 36 | Ficolin-3                                    | O75636 | 32.9  | 10.2 | 2.1 |
| 37 | Fibrinogen beta chain                        | P02675 | 55.9  | 10.2 | 1.5 |
| 38 | Retinol-binding protein 4                    | P02753 | 23.0  | 10.2 | 4.0 |
| 39 | Alpha-1B-glycoprotein                        | P04217 | 54.2  | 10.2 | 1.9 |
| 40 | Complement component C8 gamma chain          | P07360 | 22.3  | 10.2 | 3.4 |
| 41 | Complement component C7                      | P10643 | 93.5  | 10.2 | 1.0 |

|    |                                         |        |      |     |     |
|----|-----------------------------------------|--------|------|-----|-----|
| 42 | Angiotensinogen                         | P01019 | 53.1 | 9.2 | 0.9 |
| 43 | Ig delta chain C region                 | P01880 | 42.2 | 9.2 | 1.2 |
| 44 | Vitronectin                             | P04004 | 54.3 | 9.2 | 1.0 |
| 45 | Zinc-alpha-2-glycoprotein               | P25311 | 34.2 | 9.2 | 2.0 |
| 46 | Haptoglobin                             | P00738 | 45.2 | 8.7 | 2.0 |
| 47 | Fibrinogen gamma chain                  | P02679 | 51.5 | 8.3 | 0.9 |
| 48 | Human serum fetuin-A                    | P02765 | 39.3 | 8.3 | 1.1 |
| 49 | C4b-binding protein beta chain          | P20851 | 28.3 | 8.3 | 1.7 |
| 50 | Properdin                               | P27918 | 51.2 | 8.3 | 0.9 |
| 51 | Ig alpha-1 chain C region               | P01876 | 37.6 | 7.3 | 1.4 |
| 52 | Clusterin                               | P10909 | 52.5 | 7.3 | 0.9 |
| 53 | Galectin-3-binding protein              | Q08380 | 65.3 | 7.3 | 1.0 |
| 54 | Serum amyloid P-component               | P02743 | 25.4 | 6.8 | 2.2 |
| 55 | Mannan-binding lectin serine protease 1 | P48740 | 79.2 | 6.8 | 0.5 |
| 56 | Ig gamma-2 chain C region               | P01859 | 35.9 | 6.3 | 1.2 |
| 57 | Fibrinogen alpha chain                  | P02671 | 94.9 | 6.3 | 0.4 |
| 58 | Cholinesterase                          | P06276 | 68.4 | 6.3 | 0.7 |
| 59 | Plasma kallikrein                       | P03952 | 71.3 | 5.8 | 0.8 |
| 60 | Thyroxine-binding globulin              | P05543 | 46.3 | 5.8 | 1.1 |
| 61 | Carboxypeptidase N subunit 2            | P22792 | 60.5 | 5.8 | 0.7 |
| 62 | Prothrombin                             | P00734 | 70.0 | 5.3 | 0.4 |
| 63 | Ig lambda-2 chain C regions             | P0CG05 | 11.3 | 5.3 | 5.0 |
| 64 | N-acetylmuramoyl-L-alanine amidase      | Q96PD5 | 62.2 | 5.3 | 0.5 |

|    |                                              |        |       |     |     |
|----|----------------------------------------------|--------|-------|-----|-----|
| 65 | CD5 antigen-like                             | O43866 | 38.1  | 4.9 | 0.9 |
| 66 | Antithrombin-III                             | P01008 | 52.6  | 4.9 | 0.5 |
| 67 | Ig kappa chain C region                      | P01834 | 11.6  | 4.9 | 3.0 |
| 68 | Complement C1q subcomponent subunit B        | P02746 | 26.7  | 4.9 | 0.9 |
| 69 | Plasma protease C1 inhibitor                 | P05155 | 55.1  | 4.9 | 0.4 |
| 70 | Complement factor H-related protein 1        | Q03591 | 37.6  | 4.9 | 0.9 |
| 71 | Apolipoprotein A-I                           | P02647 | 30.8  | 4.4 | 1.0 |
| 72 | Transthyretin                                | P02766 | 15.9  | 4.4 | 2.7 |
| 73 | von Willebrand factor                        | P04275 | 309.1 | 4.4 | 0.1 |
| 74 | Corticosteroid-binding globulin              | P08185 | 45.1  | 4.4 | 0.9 |
| 75 | Hemoglobin subunit beta                      | P68871 | 16.0  | 4.4 | 3.7 |
| 76 | Heparin cofactor 2                           | P05546 | 57.0  | 3.9 | 0.5 |
| 77 | Inter-alpha-trypsin inhibitor heavy chain H3 | Q06033 | 99.8  | 3.9 | 0.3 |
| 78 | Complement C1q subcomponent subunit C        | P02747 | 25.8  | 3.4 | 0.6 |
| 79 | Complement component C9                      | P02748 | 63.1  | 3.4 | 0.3 |
| 80 | Dopamine beta-hydroxylase                    | P09172 | 69.0  | 3.4 | 0.4 |
| 81 | Coagulation factor XII                       | P00748 | 67.7  | 2.9 | 0.4 |
| 82 | Alpha-1-antitrypsin                          | P01009 | 46.7  | 2.9 | 0.6 |
| 83 | Alpha-1-antichymotrypsin                     | P01011 | 47.6  | 2.9 | 0.6 |
| 84 | Complement C1q subcomponent subunit A        | P02745 | 26.0  | 2.9 | 0.9 |
| 85 | Leucine-rich alpha-2-glycoprotein            | P02750 | 38.2  | 2.9 | 0.6 |
| 86 | Alpha-1-acid glycoprotein 1                  | P02763 | 23.5  | 2.9 | 0.7 |
| 87 | Tetranectin                                  | P05452 | 22.5  | 2.9 | 0.7 |

|     |                                                 |        |       |     |     |
|-----|-------------------------------------------------|--------|-------|-----|-----|
| 88  | Complement component C8 beta chain              | P07358 | 67.0  | 2.9 | 0.5 |
| 89  | Biotinidase                                     | P43251 | 61.1  | 2.9 | 0.4 |
| 90  | Alpha-2-antiplasmin                             | P08697 | 54.5  | 2.4 | 0.5 |
| 91  | Ficolin-2                                       | Q15485 | 34.0  | 2.4 | 0.4 |
| 92  | Ig kappa chain V-III region SIE                 | P01620 | 11.8  | 1.9 | 0.4 |
| 93  | Fibulin-1                                       | P23142 | 77.2  | 1.9 | 0.2 |
| 94  | Actin, cytoplasmic 1                            | P60709 | 41.7  | 1.9 | 0.4 |
| 95  | Ig kappa chain V-I region EU                    | P01598 | 11.8  | 1.5 | 1.0 |
| 96  | Ig heavy chain V-III region BRO                 | P01766 | 13.2  | 1.5 | 0.9 |
| 97  | Apolipoprotein A-II                             | P02652 | 11.2  | 1.5 | 1.1 |
| 98  | Fibronectin                                     | P02751 | 262.5 | 1.5 | 0.0 |
| 99  | Catalase                                        | P04040 | 59.7  | 1.5 | 0.3 |
| 100 | Thrombospondin-1                                | P07996 | 129.3 | 1.5 | 0.1 |
| 101 | Mannose-binding protein C                       | P11226 | 26.1  | 1.5 | 0.4 |
| 102 | Extracellular matrix protein 1                  | Q16610 | 60.6  | 1.5 | 0.2 |
| 103 | Coagulation factor XI                           | P03951 | 70.1  | 1.0 | 0.1 |
| 104 | Lipopolysaccharide-binding protein              | P18428 | 53.3  | 1.0 | 0.2 |
| 105 | Hepatocyte growth factor-like protein           | P26927 | 80.3  | 1.0 | 0.2 |
| 106 | IGF-binding protein complex acid labile subunit | P35858 | 66.0  | 1.0 | 0.1 |

---

Proteins were ranked based on the sum of spectra of the two samples.

**Supplementary Table 2. Proteins identified in refringent particles isolated from blood**

| No. | Protein Identified              | UniProt Accession No. | MW (kDa) | Particles |       | Autoclaved Particles |       |
|-----|---------------------------------|-----------------------|----------|-----------|-------|----------------------|-------|
|     |                                 |                       |          | Spectra   | emPAI | Spectra              | emPAI |
| 1   | Hemoglobin subunit beta         | P68871                | 16.0     | 542.8     | 623.5 | 734.5                | 16.0  |
| 2   | Hemoglobin subunit alpha        | P69905                | 15.2     | 377.1     | 128.5 | 470.7                | 7.7   |
| 3   | Hemoglobin subunit delta        | P02042                | 16.0     | 280.8     | 58.9  | 222.4                | 11.9  |
| 4   | Serum albumin                   | P02768                | 69.3     | –         | –     | 269.0                | 1.6   |
| 5   | Complement C3                   | P01024                | 187.0    | 88.1      | 1.6   | 77.6                 | 0.2   |
| 6   | Carbonic anhydrase 1            | P00915                | 28.9     | 101.0     | 12.6  | –                    | –     |
| 7   | Hemoglobin subunit gamma-1      | P69891                | 16.1     | 68.1      | 20.5  | –                    | –     |
| 8   | Peroxiredoxin-2                 | P32119                | 21.9     | 29.4      | 7.0   | 25.9                 | 0.5   |
| 9   | Carbonic anhydrase 2            | P00918                | 29.2     | 23.5      | 3.2   | 31.0                 | 0.3   |
| 10  | Ceruloplasmin                   | P00450                | 122.1    | 36.4      | 1.0   | –                    | –     |
| 11  | Ig gamma-1 chain C region       | P01857                | 36.1     | –         | –     | 36.2                 | 0.4   |
| 12  | Catalase                        | P04040                | 59.7     | 31.7      | 2.1   | –                    | –     |
| 13  | Apolipoprotein B-100            | P04114                | 515.3    | 22.3      | 0.1   | –                    | –     |
| 14  | Apolipoprotein A-I              | P02647                | 30.8     | 20.0      | 2.9   | –                    | –     |
| 15  | L-lactate dehydrogenase B chain | P07195                | 36.6     | 9.4       | 0.6   | 10.3                 | 0.3   |
| 16  | Antithrombin-III                | P01008                | 52.6     | 2.3       | 0.1   | 15.5                 | 0.2   |
| 17  | Beta-2-glycoprotein 1           | P02749                | 38.3     | 7.0       | 0.9   | 10.3                 | 0.2   |
| 18  | Hemopexin                       | P02790                | 51.6     | 16.4      | 0.8   | –                    | –     |
| 19  | Flavin reductase (NADPH)        | P30043                | 22.1     | 16.4      | 2.7   | –                    | –     |

|    |                                                 |        |       |      |     |   |   |
|----|-------------------------------------------------|--------|-------|------|-----|---|---|
| 20 | Complement C4-A                                 | P0C0L4 | 192.7 | 12.9 | 0.2 | – | – |
| 21 | Purine nucleoside phosphorylase                 | P00491 | 32.1  | 11.7 | 0.9 | – | – |
| 22 | Fetuin-A                                        | P02765 | 39.3  | 11.7 | 0.5 | – | – |
| 23 | Selenium-binding protein 1                      | Q13228 | 52.4  | 11.7 | 0.8 | – | – |
| 24 | Superoxide dismutase [Cu-Zn]                    | P00441 | 15.9  | 10.6 | 1.8 | – | – |
| 25 | Vitamin D-binding protein                       | P02774 | 52.9  | 10.6 | 0.5 | – | – |
| 26 | Vitronectin                                     | P04004 | 54.3  | 10.6 | 0.6 | – | – |
| 27 | Inter-alpha-trypsin inhibitor heavy chain H4    | Q14624 | 103.3 | 10.6 | 0.3 | – | – |
| 28 | Apolipoprotein A-IV                             | P06727 | 45.4  | 9.4  | 0.5 | – | – |
| 29 | Inter-alpha-trypsin inhibitor heavy chain H1    | P19827 | 101.3 | 9.4  | 0.3 | – | – |
| 30 | Complement factor B                             | P00751 | 85.5  | 8.2  | 0.3 | – | – |
| 31 | Transthyretin                                   | P02766 | 15.9  | 8.2  | 1.8 | – | – |
| 32 | Alpha-1B-glycoprotein                           | P04217 | 54.2  | 8.2  | 0.5 | – | – |
| 33 | Inter-alpha-trypsin inhibitor heavy chain H2    | P19823 | 106.4 | 8.2  | 0.5 | – | – |
| 34 | 14-3-3 protein beta/alpha                       | P31946 | 28.1  | 8.2  | 0.6 | – | – |
| 35 | Phosphoglycerate kinase 1                       | P00558 | 44.6  | 7.0  | 0.9 | – | – |
| 36 | Angiotensinogen                                 | P01019 | 53.1  | 7.0  | 0.3 | – | – |
| 37 | Histidine-rich glycoprotein                     | P04196 | 59.5  | 7.0  | 0.3 | – | – |
| 38 | Triosephosphate isomerase                       | P60174 | 30.8  | 7.0  | 0.7 | – | – |
| 39 | Apolipoprotein E                                | P02649 | 36.1  | 5.9  | 0.4 | – | – |
| 40 | Glyceraldehyde-3-phosphate dehydrogenase        | P04406 | 36.0  | 5.9  | 0.4 | – | – |
| 41 | Calpastatin                                     | P20810 | 76.5  | 5.9  | 0.2 | – | – |
| 42 | Hypoxanthine-guanine phosphoribosyl transferase | P00492 | 24.6  | 4.7  | 0.7 | – | – |



|    |                                                   |        |       |     |     |   |   |
|----|---------------------------------------------------|--------|-------|-----|-----|---|---|
| 43 | Apolipoprotein A-II                               | P02652 | 11.2  | 4.7 | 2.0 | – | – |
| 44 | Plasma protease C1 inhibitor                      | P05155 | 55.1  | 4.7 | 0.2 | – | – |
| 45 | Transitional endoplasmic reticulum ATPase         | P55072 | 89.3  | 4.7 | 0.1 | – | – |
| 46 | Peptidyl-prolyl cis-trans isomerase A             | P62937 | 18.0  | 4.7 | 1.0 | – | – |
| 47 | Glutathione S-transferase omega-1                 | P78417 | 27.5  | 4.7 | 0.6 | – | – |
| 48 | Retinal dehydrogenase 1                           | P00352 | 54.8  | 3.5 | 0.2 | – | – |
| 49 | Prothrombin                                       | P00734 | 70.0  | 3.5 | 0.2 | – | – |
| 50 | Alpha-1-antichymotrypsin                          | P01011 | 47.6  | 3.5 | 0.4 | – | – |
| 51 | Protein AMBP                                      | P02760 | 39.0  | 3.5 | 0.2 | – | – |
| 52 | Gelsolin                                          | P06396 | 85.6  | 3.5 | 0.2 | – | – |
| 53 | Heat shock cognate 71 kDa protein                 | P11142 | 70.9  | 3.5 | 0.1 | – | – |
| 54 | Delta-aminolevulinic acid dehydratase             | P13716 | 36.3  | 3.5 | 0.6 | – | – |
| 55 | Acylamino-acid-releasing enzyme                   | P13798 | 81.2  | 3.5 | 0.2 | – | – |
| 56 | Alpha-hemoglobin-stabilizing protein              | Q9NZD4 | 11.8  | 3.5 | 1.0 | – | – |
| 57 | Coagulation factor X                              | P00742 | 54.7  | 2.3 | 0.2 | – | – |
| 58 | Complement C5                                     | P01031 | 188.2 | 2.3 | 0.1 | – | – |
| 59 | Protein S100-A6                                   | P06703 | 10.2  | 2.3 | 1.2 | – | – |
| 60 | Proteasome subunit alpha type-2                   | P25787 | 25.9  | 2.3 | 0.4 | – | – |
| 61 | Serine/threonine-protein phosphatase 2A activator | Q15257 | 40.6  | 2.3 | 0.2 | – | – |

---

Proteins were ranked based on the sum of spectra of the two samples.

**Supplementary Figure 1. Full, uncropped Western blots of Figure 5E. See the legend of Figure 5 for details.**

Figure 5E, Lane 1

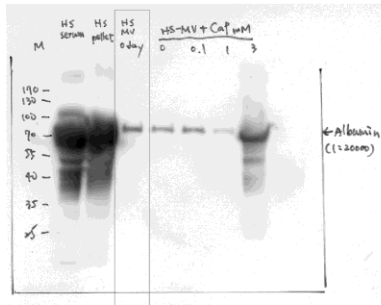

Figure 5E, Lane 2

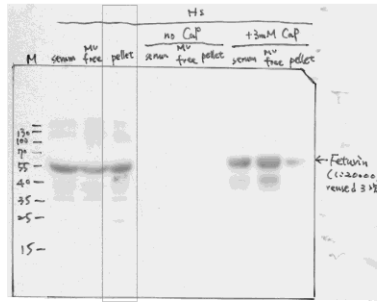

Figure 5E, Lane 3

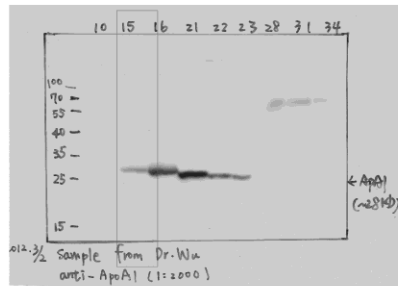

Figure 5E, Lane 4

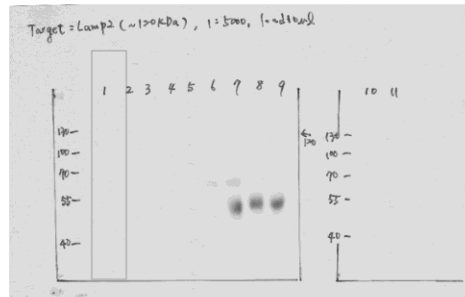

Figure 5E, Lane 5

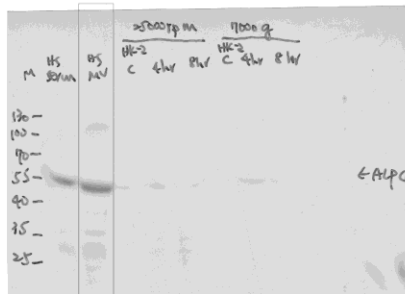

Figure 5E, Lane 6

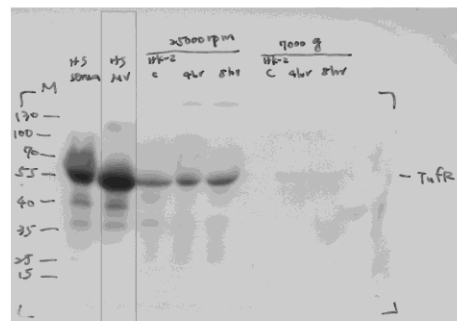

Figure 5E, Lane 7

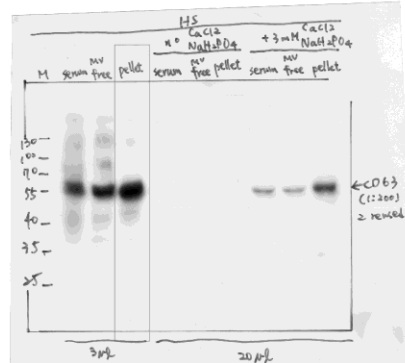

Figure 5E, Lane 8

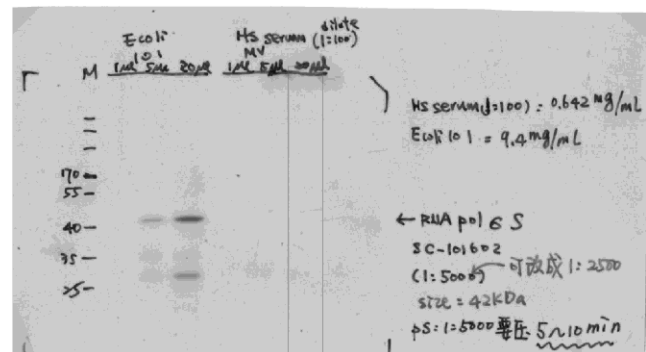

Supplement: 41598_2017_10479_MOESM1_ESM.pdf [file 41598_2017_10479_MOESM1_ESM.pdf]
